# Supplementary material for: Decadal Evolution of Aerosol-Mediated Ozone Responses in Eastern China under Clean Air Actions and Carbon Neutrality Policies
Source: Copernicus journal article supplement (doi:10.5194/egusphere-2025-4017), 2025-10-02
Supplement: Supplementary file 1 [file egusphere-2025-4017-supplement.pdf]

*Supplement of*

**Decadal Evolution of Aerosol-Mediated Ozone Responses in Eastern China Under Clean Air  
Actions and Carbon Neutrality Policies**

**Yasong Li et al.**

**Correspondence to:** Tjijian Wang (tjwang@nju.edu.cn)

**Table S1.** Seasonal changes in five key meteorological parameters (shortwave radiation (SW), temperature ( $T_2$ ), relative humidity ( $RH_2$ ), planetary boundary layer height (PBLH), and wind speed ( $WS_{10}$ )) during 2013-2020.

|        |         | SW ( $W\ m^{-2}$ ) | $T_2$ (K) | $RH_2$ (%) | PBLH (m) | $WS_{10}$ ( $m\ s^{-1}$ ) |
|--------|---------|--------------------|-----------|------------|----------|---------------------------|
| winter | Ph I    | -9.4752            | -0.5154   | 5.71323    | -16.9564 | 0.057943                  |
|        | Ph II   | -7.2357            | 0.0669    | 5.51151    | 14.8245  | 0.398526                  |
|        | Ph I+II | -16.7109           | -0.4485   | 11.22474   | -2.1319  | 0.456469                  |
| summer | Ph I    | -8.2199            | -0.6606   | 2.82714    | -47.124  | 0.012916                  |
|        | Ph II   | 62.1516            | 2.0566    | -8.70154   | 106.6647 | -0.36423                  |
|        | Ph I+II | 53.9317            | 1.396     | -5.8744    | 59.5407  | -0.35132                  |

## Domains

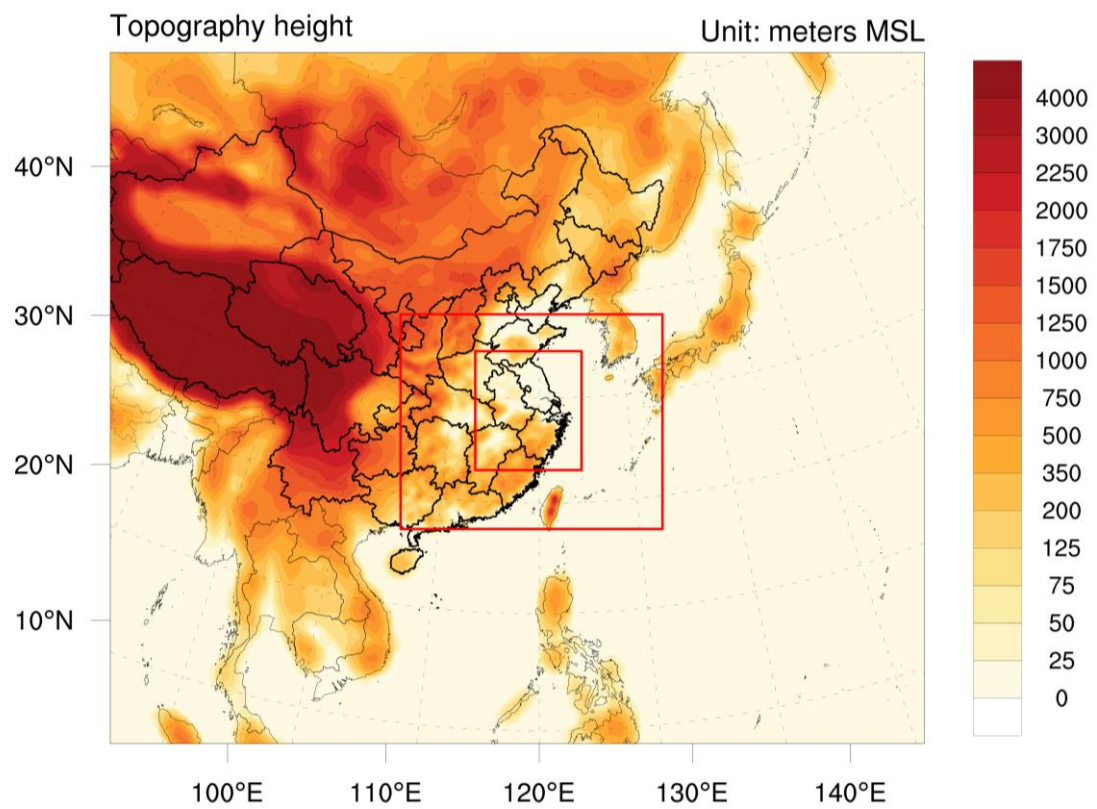

**Figure S1.** Chart of the three WRF-Chem simulation domains with topography.

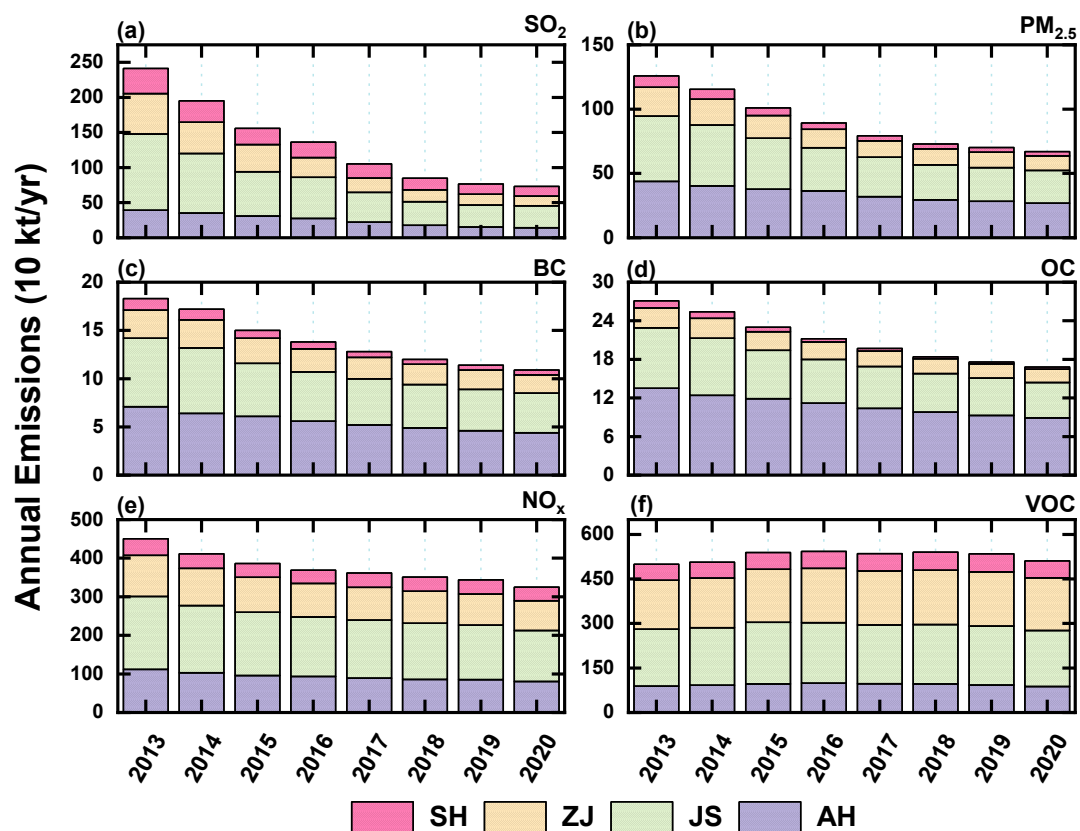

Figure S2. Trends in major anthropogenic emissions in YRD during 2013-2020.

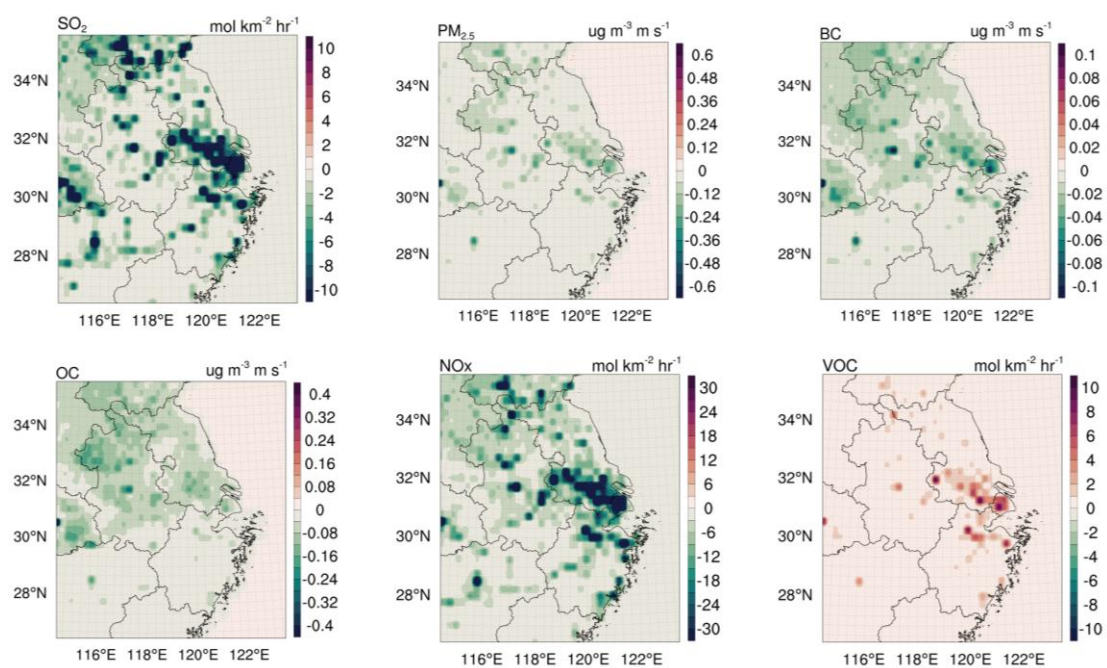

**Figure S3.** Distribution in major anthropogenic emissions changes in YRD during 2013-2020.

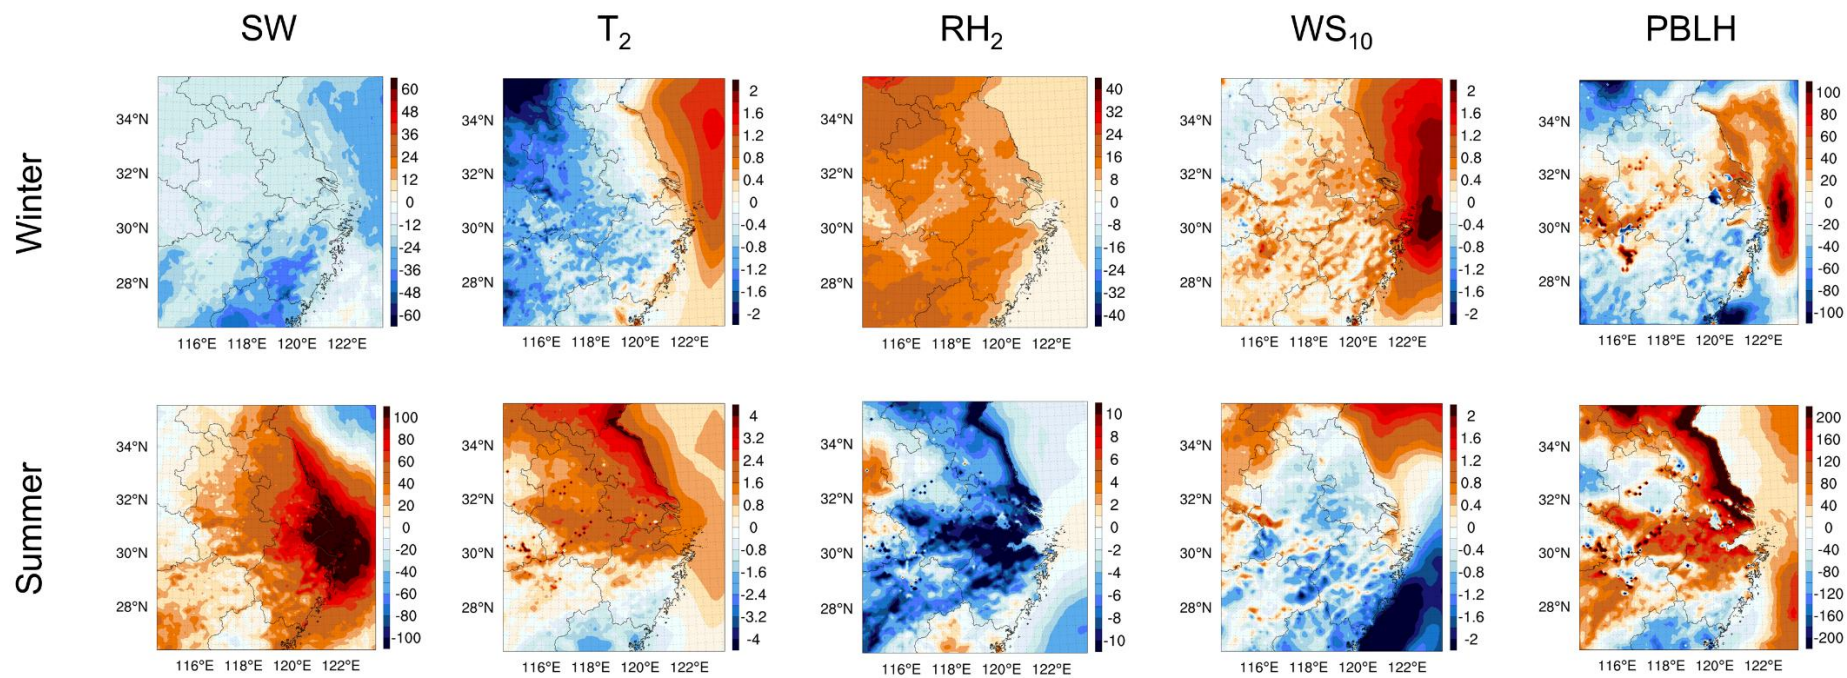

**Figure S4.** The responses of surface shortwave radiation (SW, units:  $W m^{-2}$ ),  $T_2$  (units: K),  $RH_2$  (units: %), (PBLH, f, m, units: m), and  $WS_{10}$  (units:  $m s^{-1}$ ) to variations in meteorological conditions during the summer and winter from 2013 to 2020.

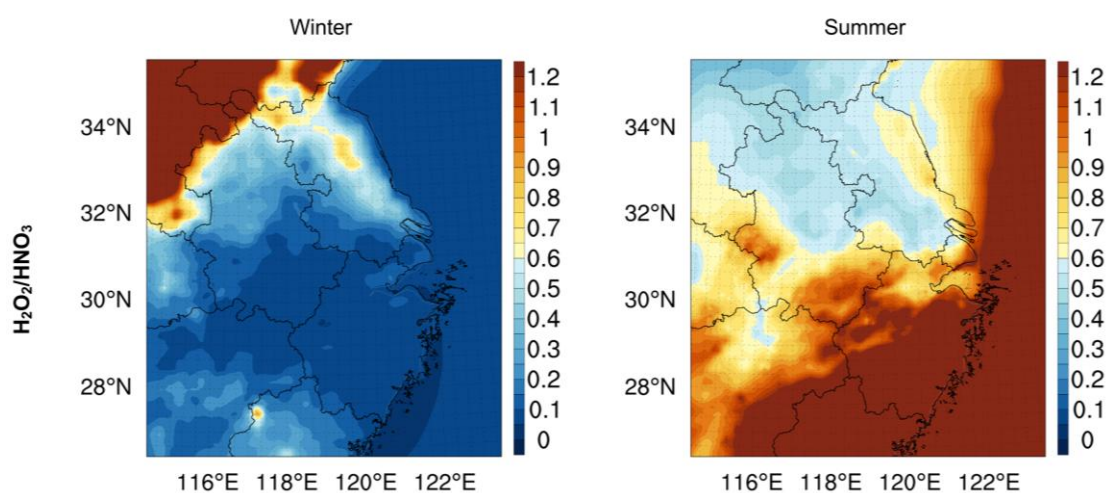

**Figure S5.** Spatial distribution of the  $\text{H}_2\text{O}_2/\text{HNO}_3$  ratio over the Yangtze River Delta under baseline conditions (20E20M\_AEs) in (a) winter and (b) summer. This ratio serves as an indicator of  $\text{O}_3$  production sensitivity: values below 0.6 indicate VOC-limited regimes, values above 0.8 indicate  $\text{NO}_x$ -limited regimes, and values between 0.6 and 0.8 correspond to transitional regimes.

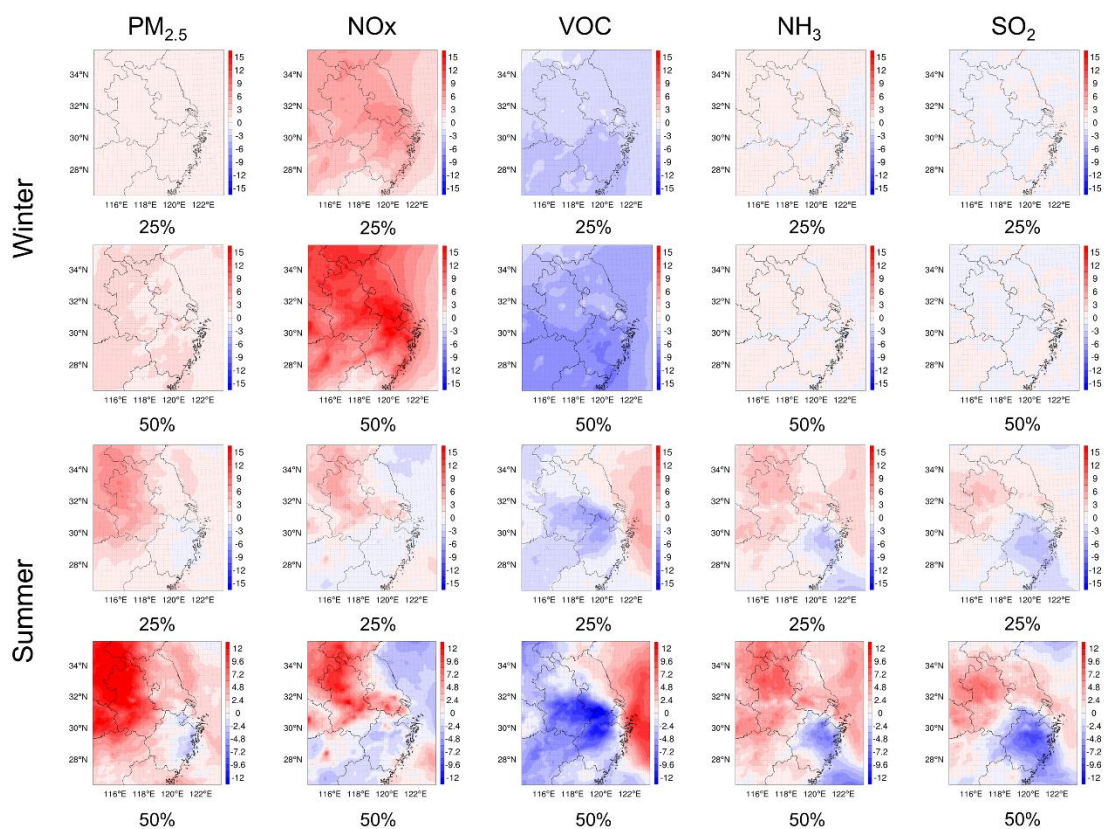

**Figure S6.** Spatial distribution of O<sub>3</sub> concentration changes (ppb) in response to (25) 50% emission reductions of primary PM<sub>2.5</sub>, NO<sub>x</sub>, VOCs, NH<sub>3</sub>, and SO<sub>2</sub> over the Yangtze River Delta during (top 2 rows) winter and (bottom 2 rows) summer, under the influence of aerosol effects (ARI+HET).

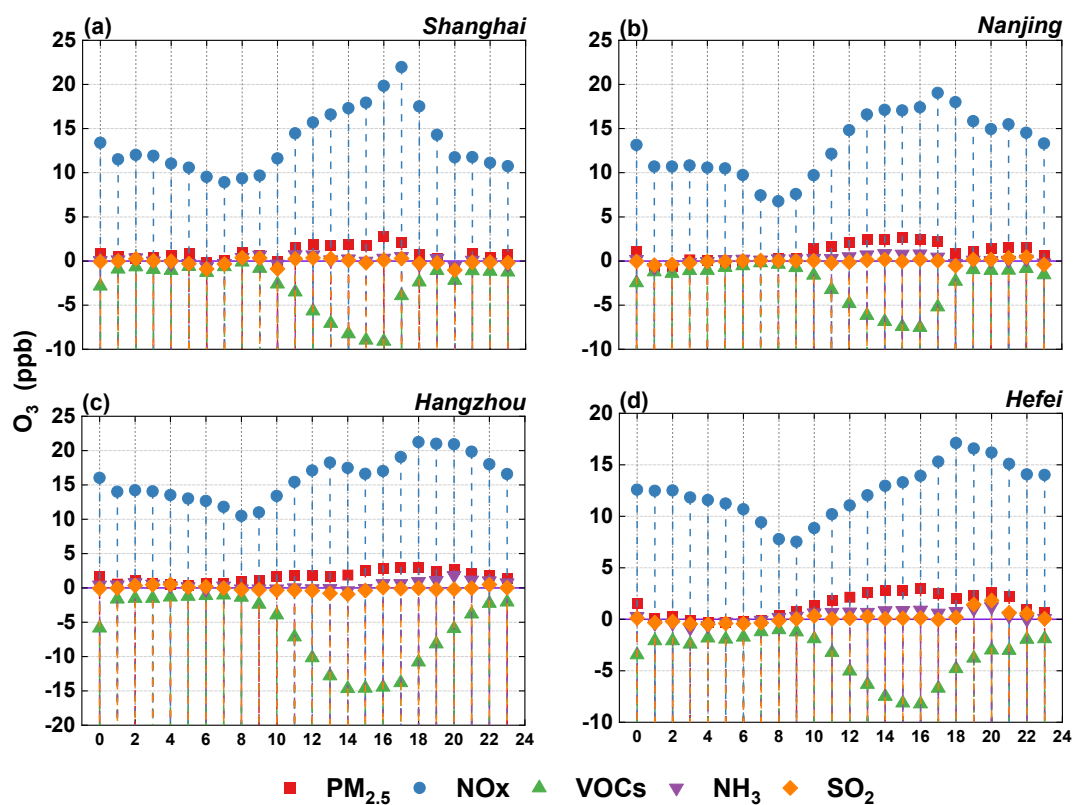

**Figure S7.** Diurnal variations in winter O<sub>3</sub> concentrations (units: ppb) in response to 50% reductions in primary PM<sub>2.5</sub>, NO<sub>x</sub>, VOCs, NH<sub>3</sub>, and SO<sub>2</sub> emissions over four typical cities in the Yangtze River Delta (Shanghai, Nanjing, Hangzhou, and Hefei) under aerosol effects (ARI+HET).

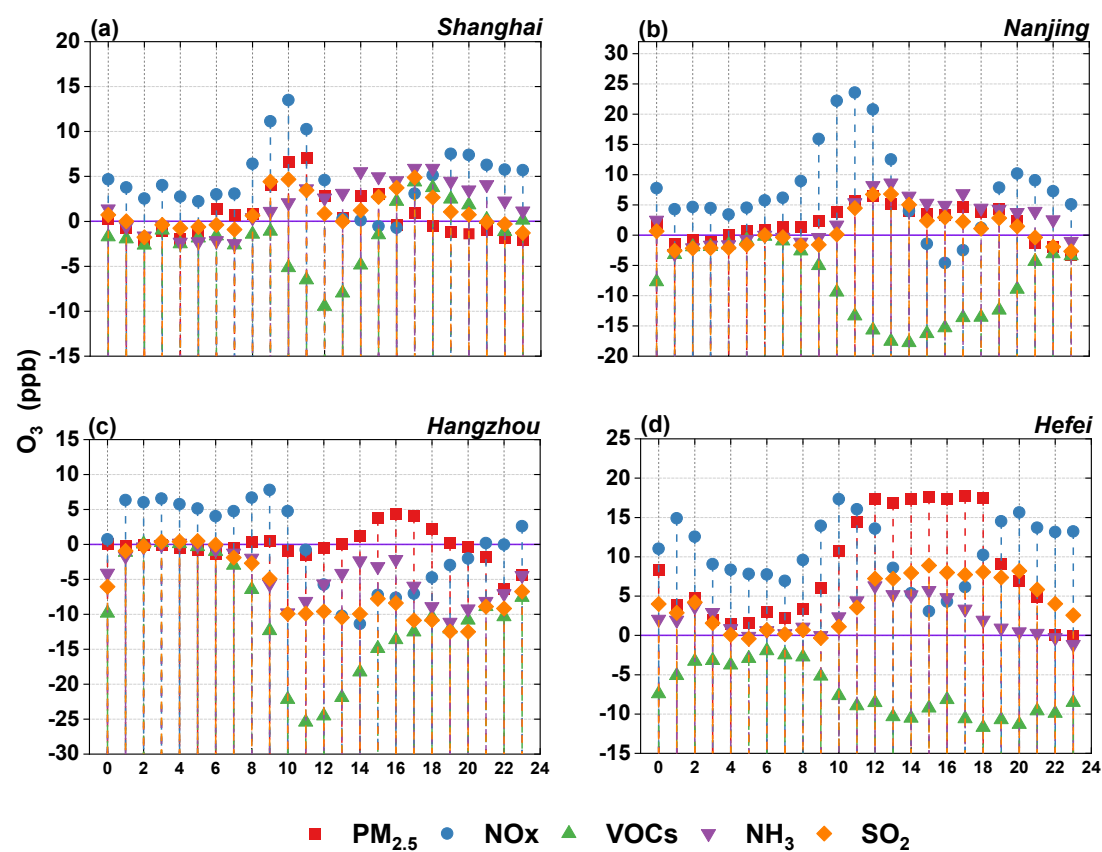

**Figure S8.** Diurnal variations in summer  $O_3$  concentrations (units: ppb) in response to 50% reductions in primary  $PM_{2.5}$ ,  $NO_x$ ,  $VOCs$ ,  $NH_3$ , and  $SO_2$  emissions over four typical cities in the Yangtze River Delta (Shanghai, Nanjing, Hangzhou, and Hefei) under aerosol effects (ARI+HET).

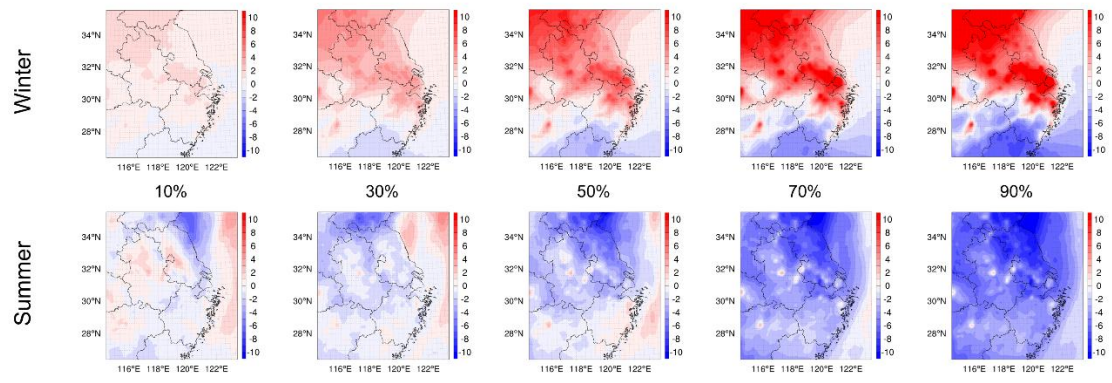

**Figure S9.** Spatial distribution of surface O<sub>3</sub> concentration changes (unit: ppb) under future carbon neutrality-driven emission reduction scenarios in winter (top) and summer (bottom) across the Yangtze River Delta.
